# Supplementary material for: Lynch syndrome pre-screening and comprehensive characterization in a multi-center large cohort of Chinese patients with colorectal cancer
Source: PubMed Central journal article supplement (PMC9425183; doi:10.20892/j.issn.2095-3941.2021.0585), 2022-06-01
Supplement: cbm-19-1235-s001.pdf [file cbm-19-1235-s001.pdf]

## Supplementary materials

**Table S1** Consistency of MMR-IHC and MSI testing

|       | MSS         | MSI-H/L     | Total | Kappa |
|-------|-------------|-------------|-------|-------|
| pMMR  | 246 (98.4%) | 4 (1.6%)    | 250   | 0.758 |
| dMMR  | 75 (18.5%)  | 331 (81.5%) | 452   |       |
| Total | 321         | 335         | 656   |       |

MMR, mismatch repair; dMMR, deficient MMR; pMMR, proficient MMR; MSI, microsatellite instability; MSI-H, MSI-high; MSI-L, MSI-low; MSS, microsatellite stability.

**Table S2** Germline variants of MMR genes detected by NGS and Sanger sequencing

| Patient | Age (years) | Stage | Gene | Variant                              | Pathogenicity     | Sanger sequencing | LS/sporadic CRCs | MMR_IHC | MSI   |
|---------|-------------|-------|------|--------------------------------------|-------------------|-------------------|------------------|---------|-------|
| P1      | 62          | III   | MLH1 | c.1641dupA:p.Y548Ifs*9               | Pathogenic        | MLH1              | LS               | dMMR    | MSI-H |
| P2      | 58          | II    | MSH2 | c.2548G>T:p.E850*                    | Pathogenic        | WT                | Sporadic         | dMMR    | MSI-H |
| P3      | 46          | III   | MLH1 | c.826dupA:p.I276Nfs*31               | Pathogenic        | Unidentified      | Unclassified     | dMMR    | MSI-H |
| P4      | 54          | III   | MSH2 | c.1386+1G>A                          | Likely pathogenic | MSH2              | LS               | dMMR    | MSI-H |
| P5      | 46          | II    | MLH1 | c.230G>A:p.Cys77Tyr                  | Pathogenic        | MLH1              | LS               | dMMR    | MSI-H |
| P5      | 46          | II    | MLH1 | c.585_588+4delAAAAGTAA               | Pathogenic        | Unidentified      | LS               | dMMR    | MSI-H |
| P6      | 51          | II    | MLH1 | c.304G>T:p.E102*                     | Pathogenic        | MLH1              | LS               | dMMR    | MSI-H |
| P7      | 61          | II    | MLH1 | c.1896+1G>A:c.1896+2T>C              | Likely pathogenic | MLH1              | LS               | dMMR    | MSI-H |
| P8      | 41          | III   | MLH1 | c.1852_1854delAAG:p.K618delK         | Pathogenic        | MLH1              | LS               | dMMR    | MSI-H |
| P8      | 41          | III   | MLH1 | c.237_238insACTGCAG:p.F80Tfs*6       | Pathogenic        | Unidentified      | LS               | dMMR    | MSI-H |
| P9      | 60          | II    | PMS2 | c.2174+1G>A                          | Pathogenic        | PMS2              | LS               | dMMR    | MSI-H |
| P10     | 61          | NA    | PMS2 | c.1970delA:p.Asn657Ilefs             | Likely pathogenic | WT                | Sporadic         | dMMR    | MSI-H |
| P11     | 61          | III   | MSH6 | c.2845dupC:p.Q949Pfs*17              | Pathogenic        | Unidentified      | Unclassified     | dMMR    | MSI-H |
| P12     | 60          | II    | PMS2 | c.1738A>T:p.Lys580Ter                | Pathogenic        | PMS2              | LS               | dMMR    | MSI-H |
| P13     | 45          | II    | MLH1 | c.791-9_792dupATTGTTTAGAT            | Likely pathogenic | Unidentified      | Unclassified     | dMMR    | MSI-H |
| P14     | 64          | III   | MSH2 | c.166delG:p.E56Rfs*8                 | Pathogenic        | MSH2              | LS               | dMMR    | MSI-H |
| P15     | 49          | I     | MLH1 | c.67G>T:p.Glu23Ter                   | Pathogenic        | MLH1              | LS               | dMMR    | MSI-H |
| P16     | 44          | II    | MSH2 | c.2131C>T:p.Arg711Ter                | Pathogenic        | MSH2              | LS               | dMMR    | MSI-H |
| P17     | 64          | II    | MLH1 | c.1929_1938delTGACAATAT:p.I643Mfs*15 | Pathogenic        | MLH1              | LS               | dMMR    | MSI-H |
| P18     | 61          | I     | PMS2 | c.1970delA:p.Asn657Ilefs             | Likely pathogenic | WT                | Sporadic         | pMMR    | MSS   |
| P19     | 25          | NA    | MLH1 | c.67G>T:p.Glu23Ter                   | Pathogenic        | MLH1              | LS               | dMMR    | MSI-H |
| P19     | 25          | NA    | PMS2 | c.1970delA:p.Asn657Ilefs             | Likely pathogenic | WT                | LS               | dMMR    | MSI-H |
| P19     | 25          | NA    | MLH1 | c.229_230insC:p.C77Sfs*2             | Pathogenic        | Unidentified      | LS               | dMMR    | MSI-H |
| P20     | 42          | II    | MLH1 | c.1631_1634delAAAC:p.Q544Pfs*46      | Pathogenic        | MLH1              | LS               | dMMR    | MSI-H |

Table S2 Continued

| Patient | Age (years) | Stage | Gene | Variant                   | Pathogenicity     | Sanger sequencing | LS/sporadic CRCs | MMR_IHC | MSI   |
|---------|-------------|-------|------|---------------------------|-------------------|-------------------|------------------|---------|-------|
| P21     | 45          | II    | MSH2 | c.1699A>T:p.Lys567Ter     | Pathogenic        | MSH2              | LS               | dMMR    | MSI-H |
| P22     | 46          | I     | MSH6 | c.3013C>T:p.Arg1005Ter    | Pathogenic        | MSH6              | LS               | dMMR    | MSS   |
| P22     | 46          | I     | MLH1 | c.677+2T>C                | Likely pathogenic | MLH1              | LS               | dMMR    | MSS   |
| P23     | 49          | II    | MSH6 | c.2104dupT:p.S702Ffs*4    | Pathogenic        | MSH6              | LS               | dMMR    | MSI-H |
| P24     | 52          | III   | PMS2 | c.1970delA:p.Asn657Ilefs  | Likely pathogenic | WT                | Sporadic         | dMMR    | MSS   |
| P25     | 58          | II    | MLH1 | c.677G>A:p.Arg226Gln      | Pathogenic        | MLH1              | LS               | dMMR    | MSI-H |
| P26     | 62          | II    | PMS2 | c.564dupA:p.H189Tfs*60    | Pathogenic        | WT                | Sporadic         | dMMR    | MSS   |
| P27     | 51          | II    | MLH1 | c.230G>A:p.Cys77Tyr       | Pathogenic        | MLH1              | LS               | dMMR    | MSI-H |
| P28     | 46          | II    | MLH1 | c.2080G>T:p.E694*         | Likely pathogenic | MLH1              | LS               | dMMR    | MSI-L |
| P29     | 56          | NA    | PMS2 | c.1970delA:p.Asn657Ilefs  | Likely pathogenic | WT                | Sporadic         | dMMR    | MSI-H |
| P30     | 60          | II    | MSH2 | c.1699A>T:p.Lys567Ter     | Pathogenic        | MSH2              | LS               | dMMR    | MSI-H |
| P31     | 62          | II    | MSH2 | c.1699A>T:p.Lys567Ter     | Pathogenic        | Unidentified      | Unclassified     | dMMR    | MSI-H |
| P32     | 73          | III   | PMS2 | c.1970delA:p.Asn657Ilefs  | Likely pathogenic | WT                | Sporadic         | dMMR    | MSS   |
| P33     | 55          | II    | MSH6 | c.1250delA:p.K417Sfs*36   | Pathogenic        | MSH6              | LS               | dMMR    | MSI-H |
| P34     | 69          | I     | MSH2 | c.942+3A>T                | Pathogenic        | MSH2              | LS               | dMMR    | MSS   |
| P35     | 56          | II    | MSH2 | c.1427delC:p.P476Lfs*6    | Pathogenic        | Unidentified      | Unclassified     | dMMR    | MSI-L |
| P36     | 50          | III   | MSH6 | c.718C>T:p.Arg24Ter       | Pathogenic        | WT                | Sporadic         | dMMR    | MSI-H |
| P36     | 50          | III   | PMS2 | c.1970delA:p.Asn657Ilefs  | Likely pathogenic | WT                | Sporadic         | dMMR    | MSI-H |
| P37     | 85          | IV    | MSH2 | c.942+3A>T                | Pathogenic        | Unidentified      | Unclassified     | dMMR    | MSS   |
| P37     | 85          | IV    | MSH6 | c.2104dupT:p.S702Ffs*4    | Pathogenic        | Unidentified      | Unclassified     | dMMR    | MSS   |
| P37     | 85          | IV    | PMS2 | c.1136dupA:p.D379Efs*3    | Pathogenic        | Unidentified      | Unclassified     | dMMR    | MSS   |
| P38     | 57          | II    | MSH2 | c.1699A>T:p.Lys567Ter     | Pathogenic        | MSH2              | LS               | dMMR    | MSI-H |
| P39     | 76          | NA    | PMS2 | c.1970delA:p.Asn657Ilefs  | Likely pathogenic | WT                | Sporadic         | dMMR    | MSI-H |
| P40     | 75          | II    | PMS2 | c.1970delA:p.Asn657Ilefs  | Likely pathogenic | WT                | Sporadic         | dMMR    | MSS   |
| P41     | 77          | I     | PMS2 | c.1970delA:p.Asn657Ilefs  | Likely pathogenic | WT                | Sporadic         | dMMR    | MSS   |
| P42     | 63          | NA    | PMS2 | c.1970delA:p.Asn657Ilefs  | Likely pathogenic | WT                | Sporadic         | dMMR    | MSI-H |
| P43     | 57          | III   | MSH6 | c.1280delA:p.Y427Sfs*26   | Pathogenic        | MSH6              | LS               | dMMR    | MSI-H |
| P44     | 62          | III   | PMS2 | c.1970delA:p.Asn657Ilefs  | Likely pathogenic | WT                | Sporadic         | dMMR    | MSS   |
| P45     | 56          | II    | MSH6 | c.3477delC:p.Tyr1159Terfs | Pathogenic        | MSH6              | LS               | dMMR    | MSI-H |
| P45     | 56          | II    | MSH2 | c.2228C>G:p.Ser743Ter     | Pathogenic        | MSH2              | LS               | dMMR    | MSI-H |
| P46     | 44          | III   | MSH2 | c.1699A>T:p.Lys567Ter     | Pathogenic        | MSH2              | LS               | dMMR    | MSI-H |
| P47     | 44          | II    | MLH1 | c.1668-2A>C               | Likely pathogenic | MLH1              | LS               | dMMR    | MSI-H |
| P48     | 65          | II    | MSH2 | c.2251G>T:p.Gly751*       | Pathogenic        | MSH2              | LS               | dMMR    | MSI-H |
| P49     | 80          | II    | PMS2 | c.1970delA:p.Asn657Ilefs  | Likely pathogenic | WT                | Sporadic         | dMMR    | MSS   |
| P50     | 54          | III   | MLH1 | c.117-1G>A                | Pathogenic        | Unidentified      | Unclassified     | dMMR    | MSI-H |

Table S2 Continued

| Patient | Age (years) | Stage | Gene | Variant                                        | Pathogenicity     | Sanger sequencing | LS/sporadic CRCs | MMR_IHC | MSI   |
|---------|-------------|-------|------|------------------------------------------------|-------------------|-------------------|------------------|---------|-------|
| P51     | 51          | II    | MSH2 | c.1216C>T:p.Arg406Ter                          | Pathogenic        | MSH2              | LS               | dMMR    | MSI-H |
| P52     | 64          | II    | MSH6 | c.855_858delTGAG:p.S285Rfs*5                   | Pathogenic        | MSH6              | LS               | dMMR    | MSI-H |
| P53     | 45          | III   | MLH1 | c.678-2A>G                                     | Likely pathogenic | Unidentified      | Unclassified     | dMMR    | MSS   |
| P54     | 59          | NA    | MLH1 | c.67G>T:p.Glu23Ter                             | Pathogenic        | WT                | Sporadic         | dMMR    | MSS   |
| P55     | 55          | II    | MSH6 | c.1243C>T:p.Gln415Ter                          | Pathogenic        | WT                | Sporadic         | dMMR    | MSI-L |
| P56     | 26          | II    | MLH1 | c.2107G>T:p.E703*                              | Pathogenic        | MLH1              | LS               | dMMR    | MSI-H |
| P57     | 35          | II    | MLH1 | c.884+4A>G                                     | Pathogenic        | MLH1              | LS               | dMMR    | MSI-H |
| P58     | 28          | NA    | MSH2 | c.2211-2A>C                                    | Likely pathogenic | MSH2              | LS               | dMMR    | MSI-H |
| P58     | 28          | NA    | PMS2 | c.1970delA:p.Asn657Ilefs                       | Likely pathogenic | WT                | LS               | dMMR    | MSI-H |
| P59     | 39          | II    | MSH2 | c.1865C>T:p.Pro622Leu                          | Pathogenic        | MSH2              | LS               | dMMR    | MSI-H |
| P60     | 34          | II    | MSH2 | c.1147C>T:p.Arg383Ter                          | Pathogenic        | MSH2              | LS               | dMMR    | MSI-H |
| P61     | 53          | II    | MLH1 | c.793C>A:p.Arg265Ser                           | Pathogenic        | MLH1              | LS               | dMMR    | MSI-H |
| P62     | 42          | II    | MSH6 | c.742C>T:p.Arg248Ter                           | Pathogenic        | Unidentified      | Unclassified     | dMMR    | MSS   |
| P63     | 54          | II    | MLH1 | c.2041G>A:p.Ala681Thr                          | Pathogenic        | MLH1              | LS               | dMMR    | MSI-H |
| P64     | 56          | NA    | PMS2 | c.1970delA:p.Asn657Ilefs                       | Likely pathogenic | WT                | Sporadic         | dMMR    | MSI-H |
| P65     | 58          | III   | MSH6 | c.2194C>T:p.Arg732Ter                          | Pathogenic        | MSH6              | LS               | dMMR    | MSI-H |
| P66     | 67          | NA    | MSH2 | c.1203dupA:p.Q402Tfs*15                        | Pathogenic        | WT                | Sporadic         | dMMR    | MSS   |
| P66     | 67          | NA    | PMS2 | c.1970delA:p.Asn657Ilefs:c.1165C>T:p.Arg389Ter | Likely pathogenic | WT                | Sporadic         | dMMR    | MSS   |
| P67     | 31          | III   | MSH2 | c.1699A>T:p.Lys567Ter                          | Pathogenic        | MSH2              | LS               | dMMR    | MSI-H |
| P68     | 60          | I     | MSH2 | c.212-2A>G                                     | Likely pathogenic | Unidentified      | Unclassified     | dMMR    | MSI-H |
| P69     | 56          | II    | MSH2 | c.862C>T:p.Gln288Ter                           | Pathogenic        | MSH2              | LS               | dMMR    | MSI-H |
| P70     | 54          | NA    | MSH2 | c.1165C>T:p.Arg389Ter                          | Pathogenic        | WT                | Sporadic         | dMMR    | MSI-H |
| P70     | 54          | NA    | PMS2 | c.1970delA:p.Asn657Ilefs                       | Likely pathogenic | WT                | Sporadic         | dMMR    | MSI-H |
| P71     | 62          | I     | PMS2 | c.1970delA:p.Asn657Ilefs                       | Likely pathogenic | WT                | Sporadic         | dMMR    | MSS   |
| P72     | 56          | II    | MSH2 | c.1978delG;p.D660Iifs*25                       | Pathogenic        | MSH2              | LS               | dMMR    | MSI-H |
| P73     | 31          | II    | MSH2 | c.1699A>T:p.Lys567Ter                          | Pathogenic        | MSH2              | LS               | dMMR    | MSI-H |
| P74     | 43          | II    | MSH2 | c.1865C>T:p.Pro622Leu; c.1699A>T:p.Lys567Ter   | Pathogenic        | MSH2              | LS               | dMMR    | MSI-H |
| P75     | 69          | II    | PMS2 | c.1970delA:p.Asn657Ilefs                       | Likely pathogenic | WT                | Sporadic         | dMMR    | MSS   |
| P76     | 47          | I     | MLH1 | c.791-1G>A                                     | Pathogenic        | MLH1              | LS               | dMMR    | MSS   |
| P77     | 67          | NA    | PMS2 | c.1970delA:p.Asn657Ilefs                       | Likely pathogenic | WT                | Unclassified     | dMMR    | MSI-H |
| P77     | 67          | NA    | PMS2 | c.444delC:p.Y149Tfs*52                         | Pathogenic        | Unidentified      | Unclassified     | dMMR    | MSI-H |
| P78     | 70          | II    | MLH1 | c.1975C>T:p.Arg659Ter                          | Pathogenic        | WT                | Sporadic         | dMMR    | MSS   |
| P78     | 70          | II    | PMS2 | c.1970delA:p.Asn657Ilefs                       | Likely pathogenic | WT                | Sporadic         | dMMR    | MSS   |
| P78     | 70          | II    | MLH1 | c.476_477delTA:p.I159Sfs*12                    | Pathogenic        | WT                | Sporadic         | dMMR    | MSS   |

Table S2 Continued

| Patient | Age (years) | Stage | Gene | Variant                          | Pathogenicity     | Sanger sequencing | LS/sporadic CRCs | MMR_IHC | MSI   |
|---------|-------------|-------|------|----------------------------------|-------------------|-------------------|------------------|---------|-------|
| P79     | 74          | II    | MSH2 | c.1699A>T:p.Lys567Ter            | Pathogenic        | Unidentified      | Unclassified     | dMMR    | MSI-H |
| P80     | 36          | I     | MLH1 | c.1683C>G;p.Tyr561Ter            | Pathogenic        | MLH1              | LS               | dMMR    | MSI-H |
| P81     | 63          | III   | MSH2 | c.1777C>T;p.Gln593Ter            | Pathogenic        | Unidentified      | Unclassified     | dMMR    | MSS   |
| P81     | 63          | III   | PMS2 | c.1970delA;p.Asn657Ilefs         | Likely pathogenic | WT                | Unclassified     | dMMR    | MSS   |
| P82     | 56          | II    | MSH2 | c.505delA;p.I169Yfs*5            | Pathogenic        | MSH2              | LS               | dMMR    | MSI-H |
| P83     | 53          | III   | MSH6 | c.1610_1613delAGTA;p.K537Iifs*33 | Pathogenic        | WT                | Sporadic         | dMMR    | MSS   |
| P84     | 63          | II    | MSH2 | c.1699A>T:p.Lys567Ter            | Pathogenic        | MSH2              | LS               | dMMR    | MSI-H |
| P85     | 49          | II    | MLH1 | c.1732-2A>G                      | Likely pathogenic | MLH1              | LS               | dMMR    | MSS   |
| P85     | 49          | II    | PMS2 | c.1738A>T:p.Lys580Ter            | Pathogenic        | WT                | LS               | dMMR    | MSS   |
| P86     | 51          | III   | MLH1 | c.753delC;p.S252Qfs*2            | Pathogenic        | MLH1              | LS               | dMMR    | MSI-H |
| P87     | 55          | II    | PMS2 | c.1738A>T:p.Lys580Ter            | Pathogenic        | PMS2              | LS               | dMMR    | MSI-H |
| P88     | 73          | NA    | PMS2 | c.1970delA;p.Asn657Ilefs         | Likely pathogenic | WT                | Sporadic         | dMMR    | MSI-H |
| P89     | 69          | I     | PMS2 | c.1738A>T:p.Lys580Ter            | Pathogenic        | PMS2              | LS               | dMMR    | MSI-H |
| P90     | 56          | I     | PMS2 | c.232_235delGAAA;p.E78Tfs*5      | Pathogenic        | PMS2              | LS               | dMMR    | MSI-H |
| P91     | 52          | II    | MSH2 | c.1699A>T:p.Lys567Ter            | Pathogenic        | MSH2              | LS               | dMMR    | MSI-H |
| P91     | 52          | II    | MSH2 | c.1981A>T:p.K661*                | Pathogenic        | MSH2              | LS               | dMMR    | MSI-H |
| P92     | 65          | I     | MSH2 | c.518T>G;p.Leu173Arg             | Pathogenic        | Unidentified      | Unclassified     | dMMR    | MSI-H |
| P93     | 54          | II    | MSH6 | c.3477delC;p.Tyr1159Terfs        | Pathogenic        | MSH6              | LS               | dMMR    | MSI-H |
| P94     | 53          | II    | MLH1 | c.1783_1784delAG;p.S595Wfs*14    | Pathogenic        | MLH1              | LS               | dMMR    | MSI-H |
| P95     | 58          | II    | MSH2 | c.1165C>T;p.Arg389Ter            | Pathogenic        | MSH2              | LS               | dMMR    | MSI-H |
| P96     | 62          | II    | MSH2 | c.1699A>T:p.Lys567Ter            | Pathogenic        | MSH2              | LS               | dMMR    | MSI-H |
| P97     | 46          | II    | MSH2 | c.1699A>T:p.Lys567Ter            | Pathogenic        | MSH2              | LS               | dMMR    | MSI-H |
| P97     | 46          | II    | MLH1 | c.677+2T>C                       | Likely pathogenic | Unidentified      | LS               | dMMR    | MSI-H |
| P98     | 54          | II    | MSH6 | c.3477delC;p.Tyr1159Terfs        | Pathogenic        | MSH6              | LS               | dMMR    | MSS   |
| P99     | 46          | II    | MSH2 | c.1699A>T:p.Lys567Ter            | Pathogenic        | Unidentified      | Unclassified     | dMMR    | MSI-H |
| P100    | 55          | I     | PMS2 | c.1970delA;p.Asn657Ilefs         | Likely pathogenic | WT                | Sporadic         | dMMR    | MSS   |
| P101    | 63          | III   | MLH1 | c.380+1G>A                       | Likely pathogenic | WT                | Sporadic         | dMMR    | MSI-L |
| P102    | 65          | II    | MLH1 | c.76C>T;p.Gln26Ter               | Pathogenic        | MLH1              | LS               | dMMR    | MSI-H |
| P103    | 63          | III   | MLH1 | c.380+1G>A                       | Likely pathogenic | MLH1              | LS               | dMMR    | MSS   |
| P103    | 63          | III   | PMS2 | c.1970delA;p.Asn657Ilefs         | Likely pathogenic | WT                | LS               | dMMR    | MSS   |
| P104    | 48          | II    | MLH1 | c.199G>A;p.Gly67Arg              | Pathogenic        | WT                | Sporadic         | dMMR    | MSI-H |
| P105    | 61          | II    | MSH2 | c.1699A>T:p.Lys567Ter            | Pathogenic        | MSH2              | LS               | dMMR    | MSI-H |
| P106    | 30          | NA    | PMS2 | c.1970delA;p.Asn657Ilefs         | Likely pathogenic | WT                | Sporadic         | dMMR    | MSI-L |
| P107    | 71          | II    | PMS2 | c.1970delA;p.Asn657Ilefs         | Likely pathogenic | WT                | Sporadic         | dMMR    | MSI-H |
| P107    | 71          | II    | MSH2 | c.807dupA;p.L270Tfs*14           | Pathogenic        | WT                | Sporadic         | dMMR    | MSI-H |

Table S2 Continued

| Patient | Age (years) | Stage | Gene | Variant                                              | Pathogenicity     | Sanger sequencing | LS/sporadic CRCs | MMR_IHC | MSI   |
|---------|-------------|-------|------|------------------------------------------------------|-------------------|-------------------|------------------|---------|-------|
| P108    | 39          | II    | MSH6 | c.3487G>T:p.Glu1163Ter;<br>c.3477delC:p.Tyr1159Terfs | Pathogenic        | MSH6              | LS               | dMMR    | MSI-H |
| P109    | 46          | II    | MSH6 | c.1249_1250delAA:p.Lys417Valfs*5                     | Pathogenic        | Unidentified      | Unclassified     | dMMR    | MSI-H |
| P110    | 45          | II    | PMS2 | c.1970delA:p.Asn657Ilefs                             | Likely pathogenic | WT                | Sporadic         | dMMR    | MSI-H |
| P111    | 65          | NA    | MLH1 | c.380+1G>A                                           | Likely pathogenic | MLH1              | LS               | dMMR    | MSI-H |
| P111    | 65          | NA    | PMS2 | c.1970delA:p.Asn657Ilefs                             | Likely pathogenic | WT                | LS               | dMMR    | MSI-H |
| P112    | 33          | IV    | MLH1 | c.1975C>T:p.Arg659Ter                                | Pathogenic        | Unidentified      | Unclassified     | dMMR    | MSI-H |
| P112    | 33          | IV    | MLH1 | c.1641dupA:p.Y548Ilefs*9                             | Pathogenic        | Unidentified      | Unclassified     | dMMR    | MSI-H |
| P113    | 44          | II    | MSH6 | c.3013C>T:p.Arg1005Ter                               | Pathogenic        | Unidentified      | Unclassified     | dMMR    | MSS   |
| P114    | 71          | II    | PMS2 | c.538-2A>G                                           | Likely pathogenic | PMS2              | LS               | dMMR    | MSI-H |
| P115    | 45          | II    | MSH2 | c.1599delT:p.R534Vfs*9                               | Pathogenic        | Unidentified      | Unclassified     | dMMR    | MSI-H |
| P116    | 48          | II    | MSH2 | c.1699A>T:p.Lys567Ter                                | Pathogenic        | WT                | Sporadic         | dMMR    | MSI-H |
| P117    | 42          | I     | MLH1 | c.1989G>A:p.Glu663=                                  | Likely pathogenic | MLH1              | LS               | dMMR    | MSI-H |
| P118    | 67          | NA    | PMS2 | c.1970delA:p.Asn657Ilefs                             | Likely pathogenic | WT                | Unclassified     | dMMR    | MSI-H |
| P118    | 67          | NA    | PMS2 | c.444delC:p.Y149Tfs*52                               | Pathogenic        | Unidentified      | Unclassified     | dMMR    | MSI-H |
| P119    | 46          | I     | MSH2 | c.1472delA:p.K491Rfs*6                               | Pathogenic        | MSH2              | LS               | dMMR    | MSI-H |
| P120    | 56          | II    | MSH2 | c.1699A>T:p.Lys567Ter                                | Pathogenic        | Unidentified      | LS               | dMMR    | MSI-H |
| P120    | 56          | II    | MLH1 | c.178C>T:p.Q60*                                      | Pathogenic        | MLH1              | LS               | dMMR    | MSI-H |
| P121    | 54          | NA    | MSH2 | c.1571G>C:p.Arg524Pro                                | Likely pathogenic | MSH2              | LS               | pMMR    | MSI-H |
| P121    | 54          | NA    | PMS2 | c.1970delA:p.Asn657Ilefs                             | Likely pathogenic | WT                | LS               | pMMR    | MSI-H |
| P122    | 43          | NA    | MSH2 | c.942+3A>T                                           | Pathogenic        | MSH2              | LS               | dMMR    | MSI-H |
| P123    | 55          | NA    | PMS2 | c.1663C>T:p.Gln555*                                  | Pathogenic        | Unidentified      | Unclassified     | dMMR    | MSI-L |
| P124    | 48          | II    | MLH1 | c.1852_1854delAAG;p.K618delK                         | Pathogenic        | MLH1              | LS               | dMMR    | MSI-H |
| P124    | 48          | II    | MLH1 | c.1896+1_1896+2delinsAC                              | Pathogenic        | Unidentified      | LS               | dMMR    | MSI-H |
| P125    | 71          | II    | PMS2 | c.1970delA:p.Asn657Ilefs                             | Likely pathogenic | WT                | Sporadic         | dMMR    | MSS   |
| P126    | 46          | III   | MSH2 | c.1699A>T:p.Lys567Ter                                | Pathogenic        | MSH2              | LS               | dMMR    | MSI-H |
| P127    | 61          | III   | PMS2 | c.1970delA:p.Asn657Ilefs                             | Likely pathogenic | WT                | LS               | dMMR    | MSS   |
| P127    | 61          | III   | MLH1 | c.380+1G>A                                           | Likely pathogenic | MLH1              | LS               | dMMR    | MSS   |
| P127    | 61          | III   | MSH6 | c.3592_3593insGA:p.A1198Gfs*19                       | Pathogenic        | Unidentified      | LS               | dMMR    | MSS   |
| P128    | 54          | II    | MSH6 | c.3477delC:p.Tyr1159Terfs                            | Pathogenic        | MSH6              | LS               | dMMR    | MSI-H |
| P128    | 54          | II    | MSH2 | c.811_814delTCTG;p.S271Rfs*2                         | Pathogenic        | MSH2              | LS               | dMMR    | MSI-H |
| P129    | 38          | III   | MSH2 | c.86delA:p.K29Sfs*35                                 | Pathogenic        | Unidentified      | Unclassified     | dMMR    | MSI-H |
| P130    | 44          | II    | MSH2 | c.560T>C:p.Leu187Pro                                 | Pathogenic        | WT                | Sporadic         | dMMR    | MSS   |
| P131    | 52          | I     | MLH1 | c.546-2A>C                                           | Pathogenic        | MLH1              | LS               | dMMR    | MSI-H |
| P132    | 45          | I     | MLH1 | c.230G>A:p.Cys77Tyr                                  | Pathogenic        | Unidentified      | Unclassified     | dMMR    | MSI-H |

Table S2 Continued

| Patient | Age (years) | Stage | Gene | Variant                                               | Pathogenicity     | Sanger sequencing | LS/sporadic CRCs | MMR_IHC | MSI   |
|---------|-------------|-------|------|-------------------------------------------------------|-------------------|-------------------|------------------|---------|-------|
| P133    | 67          | III   | MLH1 | c.1975C>T:p.Arg659Ter                                 | Pathogenic        | WT                | Sporadic         | dMMR    | MSS   |
| P133    | 67          | III   | PMS2 | c.1970delA;p.Asn657Ilefs                              | Likely pathogenic | WT                | Sporadic         | dMMR    | MSS   |
| P134    | 56          | II    | MLH1 | c.545G>A:p.Arg182Lys                                  | Pathogenic        | MLH1              | LS               | dMMR    | MSI-H |
| P135    | 50          | III   | MSH2 | c.1699A>T:p.Lys567Ter                                 | Pathogenic        | Unidentified      | Unclassified     | dMMR    | MSI-H |
| P136    | 45          | II    | MSH2 | c.2038C>T:p.Arg680Ter                                 | Pathogenic        | Unidentified      | Unclassified     | dMMR    | MSS   |
| P137    | 55          | III   | MSH6 | c.3226C>T:p.Arg1076Cys                                | Likely pathogenic | MSH6              | LS               | dMMR    | MSI-H |
| P138    | 79          | NA    | PMS2 | c.1970delA;p.Asn657Ilefs                              | Likely pathogenic | WT                | Sporadic         | dMMR    | MSI-H |
| P139    | 61          | II    | MLH1 | c.1975C>T:p.Arg659Ter                                 | Pathogenic        | WT                | Sporadic         | dMMR    | MSI-H |
| P139    | 61          | II    | PMS2 | c.1970delA;p.Asn657Ilefs                              | Likely pathogenic | WT                | Sporadic         | dMMR    | MSI-H |
| P140    | 51          | NA    | MSH2 | c.939delT;p.Q314Rfs*17                                | Pathogenic        | MSH2              | LS               | dMMR    | MSI-H |
| P141    | 51          | IV    | MSH2 | c.1699A>T:p.Lys567Ter                                 | Pathogenic        | MSH2              | LS               | dMMR    | MSI-H |
| P142    | 46          | II    | MSH6 | c.718C>T:p.Arg240Ter                                  | Pathogenic        | Unidentified      | LS               | dMMR    | MSI-H |
| P142    | 46          | II    | PMS2 | c.1970delA;p.Asn657Ilefs                              | Likely pathogenic | WT                | LS               | dMMR    | MSI-H |
| P142    | 46          | II    | MSH6 | c.3646G>T:p.Gly1216*                                  | Pathogenic        | MSH6              | LS               | dMMR    | MSI-H |
| P143    | 45          | I     | MSH2 | c.2588_2601del14;p.Y863Sfs*14                         | Pathogenic        | MSH2              | LS               | dMMR    | MSI-H |
| P144    | 44          | III   | MSH2 | c.1046C>G;p.Pro349Arg                                 | Pathogenic        | MSH2              | LS               | dMMR    | MSI-H |
| P145    | 40          | NA    | PMS2 | c.1970delA;p.Asn657Ilefs                              | Likely pathogenic | WT                | Sporadic         | pMMR    | MSS   |
| P146    | 52          | III   | MLH1 | c.1732-2A>G                                           | Likely pathogenic | MLH1              | LS               | dMMR    | MSI-H |
| P147    | 66          | II    | PMS2 | c.1970delA;p.Asn657Ilefs                              | Likely pathogenic | WT                | Sporadic         | dMMR    | MSI-H |
| P148    | 61          | NA    | PMS2 | c.1970delA;p.Asn657Ilefs                              | Likely pathogenic | WT                | Unclassified     | dMMR    | MSI-H |
| P148    | 61          | NA    | PMS2 | c.1663C>T;p.Gln555*                                   | Pathogenic        | Unidentified      | Unclassified     | dMMR    | MSI-H |
| P149    | 40          | II    | MSH2 | c.1699A>T:p.Lys567Ter                                 | Pathogenic        | MSH2              | LS               | dMMR    | MSI-H |
| P150    | 56          | II    | MSH6 | c.3734_3755del22;p.F1245*fs*1                         | Pathogenic        | Unidentified      | Unclassified     | dMMR    | MSI-H |
| P151    | 58          | II    | PMS2 | c.1738A>T:p.Lys580Ter                                 | Pathogenic        | Unidentified      | Unclassified     | dMMR    | MSI-H |
| P152    | 59          | II    | MSH6 | c.956_957insA;p.P320Afs*9;<br>c.1269dupT;p.V424Cfs*11 | Pathogenic        | Unidentified      | LS               | dMMR    | MSI-H |
| P152    | 59          | II    | MSH2 | c.273dupT;p.L92Sfs*8; c.516delA;p.<br>K172Nfs*2       | Pathogenic        | MSH2              | LS               | dMMR    | MSI-H |
| P152    | 59          | II    | MLH1 | c.1509dupC;p.T504Hfs*2                                | Pathogenic        | Unidentified      | LS               | dMMR    | MSI-H |
| P153    | 22          | II    | MSH2 | c.1699A>T:p.Lys567Ter                                 | Pathogenic        | MSH2              | LS               | dMMR    | MSI-H |
| P154    | 54          | II    | MSH2 | c.643_644insG;p.Q215Rfs*17                            | Pathogenic        | MSH2              | LS               | dMMR    | MSI-H |

**Table S3** Demographic and clinicopathological features of LS, dMMR/MSI-H sporadic CRCs, and non-dMMR/MSI-H sporadic CRCs

| Parameters      | LS, n = 88 |            | Sporadic_dMMR/MSI-H, n = 292 |            | P value |           | Sporadic_non-dMMR/MSI-H, n = 248 |       | Sporadic_dMMR/MSI-H, n = 292 |            | Sporadic_non-dMMR/MSI-H, n = 248 |            | P value |        |
|-----------------|------------|------------|------------------------------|------------|---------|-----------|----------------------------------|-------|------------------------------|------------|----------------------------------|------------|---------|--------|
|                 | n (%)      | n (%)      | n (%)                        | n (%)      | n (%)   | n (%)     | n (%)                            | n (%) | n (%)                        | n (%)      | n (%)                            | n (%)      | n (%)   | n (%)  |
| Gender          |            |            |                              |            | 0.48    |           |                                  |       | 0.54                         |            |                                  |            |         | 0.89   |
| Male            | 54 (61.4)  | 165 (57.1) | 54 (61.4)                    | 143 (57.7) |         | 54 (61.4) | 143 (57.7)                       |       | 165 (57.1)                   | 143 (57.7) | 165 (57.1)                       | 143 (57.7) |         |        |
| Female          | 34 (38.6)  | 124 (42.9) | 34 (38.6)                    | 105 (42.3) |         | 34 (38.6) | 105 (42.3)                       |       | 124 (42.9)                   | 105 (42.3) | 124 (42.9)                       | 105 (42.3) |         |        |
| Age             |            |            |                              |            | 0.016   |           |                                  |       | 0.016                        |            |                                  |            |         | 0.93   |
| <55             | 53 (60.2)  | 107 (36.6) | 53 (60.2)                    | 90 (36.3)  |         | 53 (60.2) | 90 (36.3)                        |       | 107 (36.6)                   | 90 (36.3)  | 107 (36.6)                       | 90 (36.3)  |         |        |
| ≥55             | 35 (39.8)  | 185 (63.4) | 35 (39.8)                    | 158 (63.7) |         | 35 (39.8) | 158 (63.7)                       |       | 185 (63.4)                   | 158 (63.7) | 185 (63.4)                       | 158 (63.7) |         |        |
| Clinical stage  |            |            |                              |            | 0.59    |           |                                  |       | <0.001                       |            |                                  |            |         | <0.001 |
| I               | 11 (13.6)  | 33 (12.0)  | 11 (13.6)                    | 11 (5.0)   |         | 11 (13.6) | 11 (5.0)                         |       | 33 (12.0)                    | 11 (5.0)   | 33 (12.0)                        | 11 (5.0)   |         |        |
| II              | 53 (65.4)  | 163 (59.5) | 53 (65.4)                    | 66 (30.3)  |         | 53 (65.4) | 66 (30.3)                        |       | 163 (59.5)                   | 66 (30.3)  | 163 (59.5)                       | 66 (30.3)  |         |        |
| III             | 15 (18.5)  | 71 (25.9)  | 15 (18.5)                    | 117 (53.7) |         | 15 (18.5) | 117 (53.7)                       |       | 71 (25.9)                    | 117 (53.7) | 71 (25.9)                        | 117 (53.7) |         |        |
| IV              | 2 (2.5)    | 7 (2.6)    | 2 (2.5)                      | 24 (11.0)  |         | 2 (2.5)   | 24 (11.0)                        |       | 7 (2.6)                      | 24 (11.0)  | 7 (2.6)                          | 24 (11.0)  |         |        |
| Location        |            |            |                              |            | 0.12    |           |                                  |       | <0.001                       |            |                                  |            |         | <0.001 |
| Left            | 26 (32.5)  | 105 (42.3) | 26 (32.5)                    | 190 (79.5) |         | 26 (32.5) | 190 (79.5)                       |       | 105 (42.3)                   | 190 (79.5) | 105 (42.3)                       | 190 (79.5) |         |        |
| Right           | 54 (67.5)  | 143 (57.7) | 54 (67.5)                    | 49 (20.5)  |         | 54 (67.5) | 49 (20.5)                        |       | 143 (57.7)                   | 49 (20.5)  | 143 (57.7)                       | 49 (20.5)  |         |        |
| Differentiation |            |            |                              |            | 0.73    |           |                                  |       | <0.001                       |            |                                  |            |         | <0.001 |
| Low             | 21 (33.3)  | 63 (29.9)  | 21 (33.3)                    | 30 (13.0)  |         | 21 (33.3) | 30 (13.0)                        |       | 63 (29.9)                    | 30 (13.0)  | 63 (29.9)                        | 30 (13.0)  |         |        |
| Medium          | 38 (60.3)  | 138 (65.4) | 38 (60.3)                    | 193 (83.5) |         | 38 (60.3) | 193 (83.5)                       |       | 138 (65.4)                   | 193 (83.5) | 138 (65.4)                       | 193 (83.5) |         |        |
| High            | 4 (6.3)    | 10 (4.7)   | 4 (6.3)                      | 8 (3.5)    |         | 4 (6.3)   | 8 (3.5)                          |       | 10 (4.7)                     | 8 (3.5)    | 10 (4.7)                         | 8 (3.5)    |         |        |
| Mucinous        |            |            |                              |            | 0.1     |           |                                  |       | <0.001                       |            |                                  |            |         | <0.001 |
| No              | 10 (33.3)  | 75 (49.7)  | 10 (33.3)                    | 207 (83.5) |         | 10 (33.3) | 207 (83.5)                       |       | 75 (49.7)                    | 207 (83.5) | 75 (49.7)                        | 207 (83.5) |         |        |
| Yes             | 20 (66.7)  | 76 (50.3)  | 20 (66.7)                    | 41 (16.5)  |         | 20 (66.7) | 41 (16.5)                        |       | 76 (50.3)                    | 41 (16.5)  | 76 (50.3)                        | 41 (16.5)  |         |        |

dMMR, deficient mismatch repair; MSI-H, high microsatellite instability, LS: Lynch syndrome.

**Table S4** Demographic and clinicopathological features of LS subgroups with different germline variant genes and sporadic CRCs

| Parameters      | MLH1_LS,<br>n = 33 |            | Sporadic,<br>n = 540 |            | P value |         | MSH2_LS,<br>n = 39 |            | Sporadic,<br>n = 540 |       | P value  |            | MSH6_LS,<br>n = 13 |            | Sporadic,<br>n = 540 |            | PMS2_LS,<br>n = 6 |            | Sporadic,<br>n = 540 |            | P value  |            |          |
|-----------------|--------------------|------------|----------------------|------------|---------|---------|--------------------|------------|----------------------|-------|----------|------------|--------------------|------------|----------------------|------------|-------------------|------------|----------------------|------------|----------|------------|----------|
|                 | n (%)              | n (%)      | n (%)                | n (%)      | n (%)   | n (%)   | n (%)              | n (%)      | n (%)                | n (%) | n (%)    | n (%)      | n (%)              | n (%)      | n (%)                | n (%)      | n (%)             | n (%)      | n (%)                | n (%)      | n (%)    | n (%)      |          |
| Gender          |                    |            |                      |            |         |         |                    |            |                      |       |          |            |                    |            |                      |            |                   |            |                      |            |          |            |          |
| Male            | 24 (72.7)          | 308 (57.4) | 21 (53.8)            | 308 (57.4) | 0.08    | 0.67    | 7 (53.8)           | 308 (57.4) | 0.8                  | 0.97  | 4 (66.7) | 308 (57.4) | 4 (66.7)           | 308 (57.4) | 4 (66.7)             | 308 (57.4) | 4 (66.7)          | 308 (57.4) | 4 (66.7)             | 308 (57.4) | 4 (66.7) | 308 (57.4) | 4 (66.7) |
| Female          | 9 (27.3)           | 229 (42.6) | 18 (46.2)            | 229 (42.6) |         |         | 6 (46.2)           | 229 (42.6) |                      |       | 2 (33.3) | 229 (42.6) | 2 (33.3)           | 229 (42.6) | 2 (33.3)             | 229 (42.6) | 2 (33.3)          | 229 (42.6) | 2 (33.3)             | 229 (42.6) | 2 (33.3) | 229 (42.6) | 2 (33.3) |
| Age (yr)        |                    |            |                      |            |         |         |                    |            |                      |       |          |            |                    |            |                      |            |                   |            |                      |            |          |            |          |
| <55             | 23 (69.7)          | 197 (36.5) | 25 (64.1)            | 197 (36.5) | < 0.001 | < 0.001 | 7 (53.8)           | 197 (36.5) | 0.32                 | 0.15  | 0 (0)    | 197 (36.5) | 0 (0)              | 197 (36.5) | 0 (0)                | 197 (36.5) | 0 (0)             | 197 (36.5) | 0 (0)                | 197 (36.5) | 0 (0)    | 197 (36.5) | 0 (0)    |
| ≥55             | 10 (30.3)          | 343 (63.5) | 14 (35.9)            | 343 (63.5) |         |         | 6 (46.2)           | 343 (63.5) |                      |       | 6 (100)  | 343 (63.5) | 6 (100)            | 343 (63.5) | 6 (100)              | 343 (63.5) | 6 (100)           | 343 (63.5) | 6 (100)              | 343 (63.5) | 6 (100)  | 343 (63.5) | 6 (100)  |
| Clinical stage  |                    |            |                      |            |         |         |                    |            |                      |       |          |            |                    |            |                      |            |                   |            |                      |            |          |            |          |
| I               | 6 (20.0)           | 44 (8.9)   | 3 (8.6)              | 44 (8.9)   | 0.067   | 0.032   | 1 (7.7)            | 44 (8.9)   | 0.47                 | 0.067 | 2 (33.3) | 44 (8.9)   | 2 (33.3)           | 44 (8.9)   | 2 (33.3)             | 44 (8.9)   | 2 (33.3)          | 44 (8.9)   | 2 (33.3)             | 44 (8.9)   | 2 (33.3) | 44 (8.9)   | 2 (33.3) |
| II              | 17 (56.7)          | 229 (46.5) | 25 (71.4)            | 229 (46.5) |         |         | 9 (69.2)           | 229 (46.5) |                      |       | 4 (66.7) | 229 (46.5) | 4 (66.7)           | 229 (46.5) | 4 (66.7)             | 229 (46.5) | 4 (66.7)          | 229 (46.5) | 4 (66.7)             | 229 (46.5) | 4 (66.7) | 229 (46.5) | 4 (66.7) |
| III             | 6 (20.0)           | 188 (38.2) | 6 (17.1)             | 188 (38.2) |         |         | 3 (23.1)           | 188 (38.2) |                      |       | 0 (0)    | 188 (38.2) | 0 (0)              | 188 (38.2) | 0 (0)                | 188 (38.2) | 0 (0)             | 188 (38.2) | 0 (0)                | 188 (38.2) | 0 (0)    | 188 (38.2) | 0 (0)    |
| IV              | 1 (3.3)            | 31 (6.3)   | 1 (2.9)              | 31 (6.3)   |         |         | 0 (0)              | 31 (6.3)   |                      |       | 0 (0)    | 31 (6.3)   | 0 (0)              | 31 (6.3)   | 0 (0)                | 31 (6.3)   | 0 (0)             | 31 (6.3)   | 0 (0)                | 31 (6.3)   | 0 (0)    | 31 (6.3)   | 0 (0)    |
| Location        |                    |            |                      |            |         |         |                    |            |                      |       |          |            |                    |            |                      |            |                   |            |                      |            |          |            |          |
| Left            | 9 (33.3)           | 295 (60.6) | 9 (24.3)             | 295 (60.6) | 0.005   | < 0.001 | 6 (46.2)           | 295 (60.6) | 0.29                 | 0.92  | 3 (50)   | 295 (60.6) | 3 (50)             | 295 (60.6) | 3 (50)               | 295 (60.6) | 3 (50)            | 295 (60.6) | 3 (50)               | 295 (60.6) | 3 (50)   | 295 (60.6) | 3 (50)   |
| Right           | 18 (66.7)          | 192 (39.4) | 28 (75.7)            | 192 (39.4) |         |         | 7 (53.8)           | 192 (39.4) |                      |       | 3 (50)   | 192 (39.4) | 3 (50)             | 192 (39.4) | 3 (50)               | 192 (39.4) | 3 (50)            | 192 (39.4) | 3 (50)               | 192 (39.4) | 3 (50)   | 192 (39.4) | 3 (50)   |
| Differentiation |                    |            |                      |            |         |         |                    |            |                      |       |          |            |                    |            |                      |            |                   |            |                      |            |          |            |          |
| Low             | 7 (36.8)           | 93 (21.0)  | 10 (33.3)            | 93 (21.0)  | 0.17    | 0.29    | 2 (20.0)           | 93 (21.0)  | 0.51                 | 0.011 | 2 (33.3) | 93 (21.0)  | 2 (33.3)           | 93 (21.0)  | 2 (33.3)             | 93 (21.0)  | 2 (33.3)          | 93 (21.0)  | 2 (33.3)             | 93 (21.0)  | 2 (33.3) | 93 (21.0)  | 2 (33.3) |
| Medium          | 11 (57.9)          | 331 (74.9) | 19 (63.3)            | 331 (74.9) |         |         | 7 (70.0)           | 331 (74.9) |                      |       | 2 (33.3) | 331 (74.9) | 2 (33.3)           | 331 (74.9) | 2 (33.3)             | 331 (74.9) | 2 (33.3)          | 331 (74.9) | 2 (33.3)             | 331 (74.9) | 2 (33.3) | 331 (74.9) | 2 (33.3) |
| High            | 1 (5.3)            | 18 (4.1)   | 1 (3.3)              | 18 (4.1)   |         |         | 1 (10.0)           | 18 (4.1)   |                      |       | 2 (33.3) | 18 (4.1)   | 2 (33.3)           | 18 (4.1)   | 2 (33.3)             | 18 (4.1)   | 2 (33.3)          | 18 (4.1)   | 2 (33.3)             | 18 (4.1)   | 2 (33.3) | 18 (4.1)   | 2 (33.3) |
| Mucinous        |                    |            |                      |            |         |         |                    |            |                      |       |          |            |                    |            |                      |            |                   |            |                      |            |          |            |          |
| No              | 5 (50.0)           | 282 (70.7) | 4 (30.8)             | 282 (70.7) | 0.29    | 0.006   | 1 (16.7)           | 282 (70.7) | 0.016                | 0.088 | 0 (0)    | 282 (70.7) | 0 (0)              | 282 (70.7) | 0 (0)                | 282 (70.7) | 0 (0)             | 282 (70.7) | 0 (0)                | 282 (70.7) | 0 (0)    | 282 (70.7) | 0 (0)    |
| Yes             | 5 (50.0)           | 117 (29.3) | 9 (69.2)             | 117 (29.3) |         |         | 5 (83.3)           | 117 (29.3) |                      |       | 2 (100)  | 117 (29.3) | 2 (100)            | 117 (29.3) | 2 (100)              | 117 (29.3) | 2 (100)           | 117 (29.3) | 2 (100)              | 117 (29.3) | 2 (100)  | 117 (29.3) | 2 (100)  |
| MSI             |                    |            |                      |            |         |         |                    |            |                      |       |          |            |                    |            |                      |            |                   |            |                      |            |          |            |          |
| MSI-H           | 27 (81.8)          | 221 (40.9) | 38 (97.4)            | 221 (40.9) | < 0.001 | < 0.001 | 11 (84.6)          | 221 (40.9) | 0.008                | 0.012 | 6 (100)  | 221 (40.9) | 6 (100)            | 221 (40.9) | 6 (100)              | 221 (40.9) | 6 (100)           | 221 (40.9) | 6 (100)              | 221 (40.9) | 6 (100)  | 221 (40.9) | 6 (100)  |
| MSI-L           | 1 (3.0)            | 11 (2.0)   | 0 (0)                | 11 (2.0)   |         |         | 0 (0)              | 11 (2.0)   |                      |       | 0 (0)    | 11 (2.0)   | 0 (0)              | 11 (2.0)   | 0 (0)                | 11 (2.0)   | 0 (0)             | 11 (2.0)   | 0 (0)                | 11 (2.0)   | 0 (0)    | 11 (2.0)   | 0 (0)    |
| MSS             | 5 (15.2)           | 308 (57.0) | 1 (2.6)              | 308 (57.0) |         |         | 2 (15.4)           | 308 (57.0) |                      |       | 0 (0)    | 308 (57.0) | 0 (0)              | 308 (57.0) | 0 (0)                | 308 (57.0) | 0 (0)             | 308 (57.0) | 0 (0)                | 308 (57.0) | 0 (0)    | 308 (57.0) | 0 (0)    |
| MMR-IHC         |                    |            |                      |            |         |         |                    |            |                      |       |          |            |                    |            |                      |            |                   |            |                      |            |          |            |          |
| dMMR            | 33 (100)           | 291 (53.9) | 38 (97.4)            | 291 (53.9) | < 0.001 | < 0.001 | 13 (100)           | 291 (53.9) | < 0.001              | 0.065 | 6 (100)  | 291 (53.9) | 6 (100)            | 291 (53.9) | 6 (100)              | 291 (53.9) | 6 (100)           | 291 (53.9) | 6 (100)              | 291 (53.9) | 6 (100)  | 291 (53.9) | 6 (100)  |
| pMMR            | 0 (0)              | 249 (46.1) | 1 (2.6)              | 249 (46.1) |         |         | 0 (0)              | 249 (46.1) |                      |       | 0 (0)    | 249 (46.1) | 0 (0)              | 249 (46.1) | 0 (0)                | 249 (46.1) | 0 (0)             | 249 (46.1) | 0 (0)                | 249 (46.1) | 0 (0)    | 249 (46.1) | 0 (0)    |

MMR, mismatch repair; dMMR, deficient MMR; pMMR, proficient MMR; MSI, microsatellite instability; MSI-H, MSI-high; MSI-L, MSI-low; MSS, microsatellite stability; LS: Lynch syndrome.





Table S5 Continued

| Parameters | MLH1_LS,<br>n = 33 | Non_MLH1_LS,<br>n = 55 | P value | MSH2_LS,<br>n = 39 | Non_MSH2_LS,<br>n = 49 | P value | MSH6,<br>n = 13 | Non_MSH6_LS,<br>n = 75 | P value | PMS2_LS,<br>n = 6 | Non_PMS2_LS,<br>n = 82 | P value |
|------------|--------------------|------------------------|---------|--------------------|------------------------|---------|-----------------|------------------------|---------|-------------------|------------------------|---------|
|            | n (%)              | n (%)                  |         | n (%)              | n (%)                  |         | n (%)           | n (%)                  |         | n (%)             | n (%)                  |         |
| MMR-IHC    |                    |                        | 1       |                    |                        | 0.44    |                 |                        | 1       |                   |                        | 1       |
| dMMR       | 33 (100)           | 54 (98.2)              |         | 38 (97.4)          | 49 (100)               |         | 13 (100)        | 74 (98.7)              |         | 6 (100)           | 81 (98.8)              |         |
| pMMR       | 0 (0)              | 1 (1.8)                |         | 1 (2.6)            | 0 (0)                  |         | 0 (0)           | 1 (1.3)                |         | 0 (0)             | 1 (1.2)                |         |

MMR, mismatch repair; dMMR, deficient MMR; pMMR, proficient MMR; MSI, microsatellite instability; MSI-H, MSI-high; MSI-L, MSI-low; MSS, microsatellite stability; LS: Lynch syndrome.

Table S6 Performance of MMR IHC and MSI testing for LS pre-screening

|         | Sensitivity (%) | Specificity (%) | PPV (%) | NPV (%) |
|---------|-----------------|-----------------|---------|---------|
| dMMR    | 98.9            | 46.1            | 23.0    | 99.6    |
| MSI-H   | 90.9            | 59.1            | 26.6    | 97.6    |
| MSI-H/L | 92.0            | 57.0            | 25.9    | 97.8    |

MMR, mismatch repair; MSI, microsatellite instability; PPV, positive predictive value; NPV, negative predictive value.

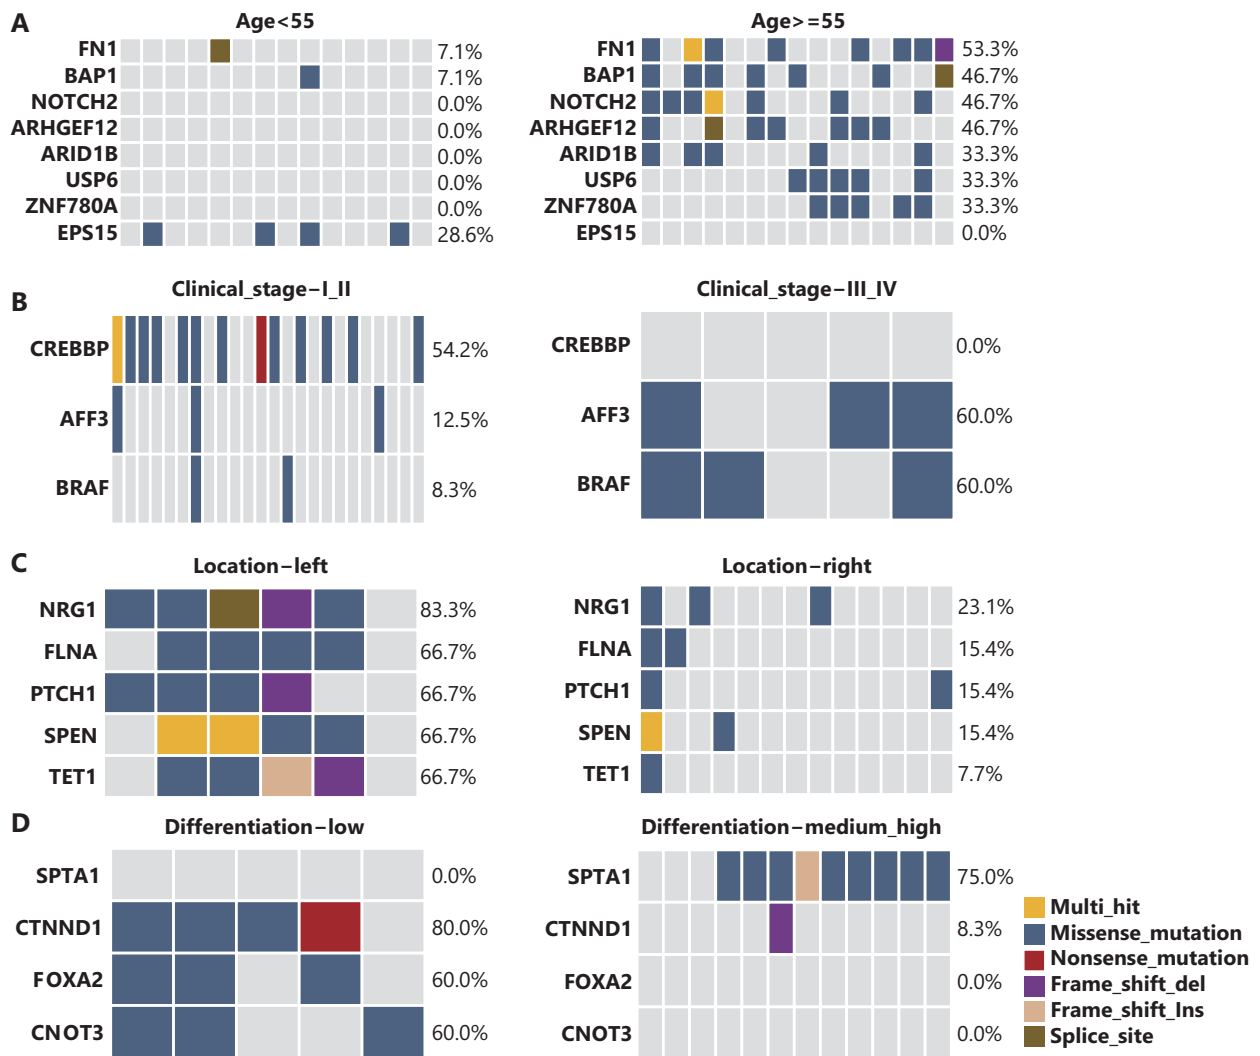

**Figure S1** Comparison of gene variant frequencies in groups with different clinical features. (A–D) Cancer associated genes with significantly different variant frequencies in groups with different ages, clinical stages, tumor locations, and degrees of differentiation. Each row represents a gene, each column represents a sample, and colors represent types of variants.

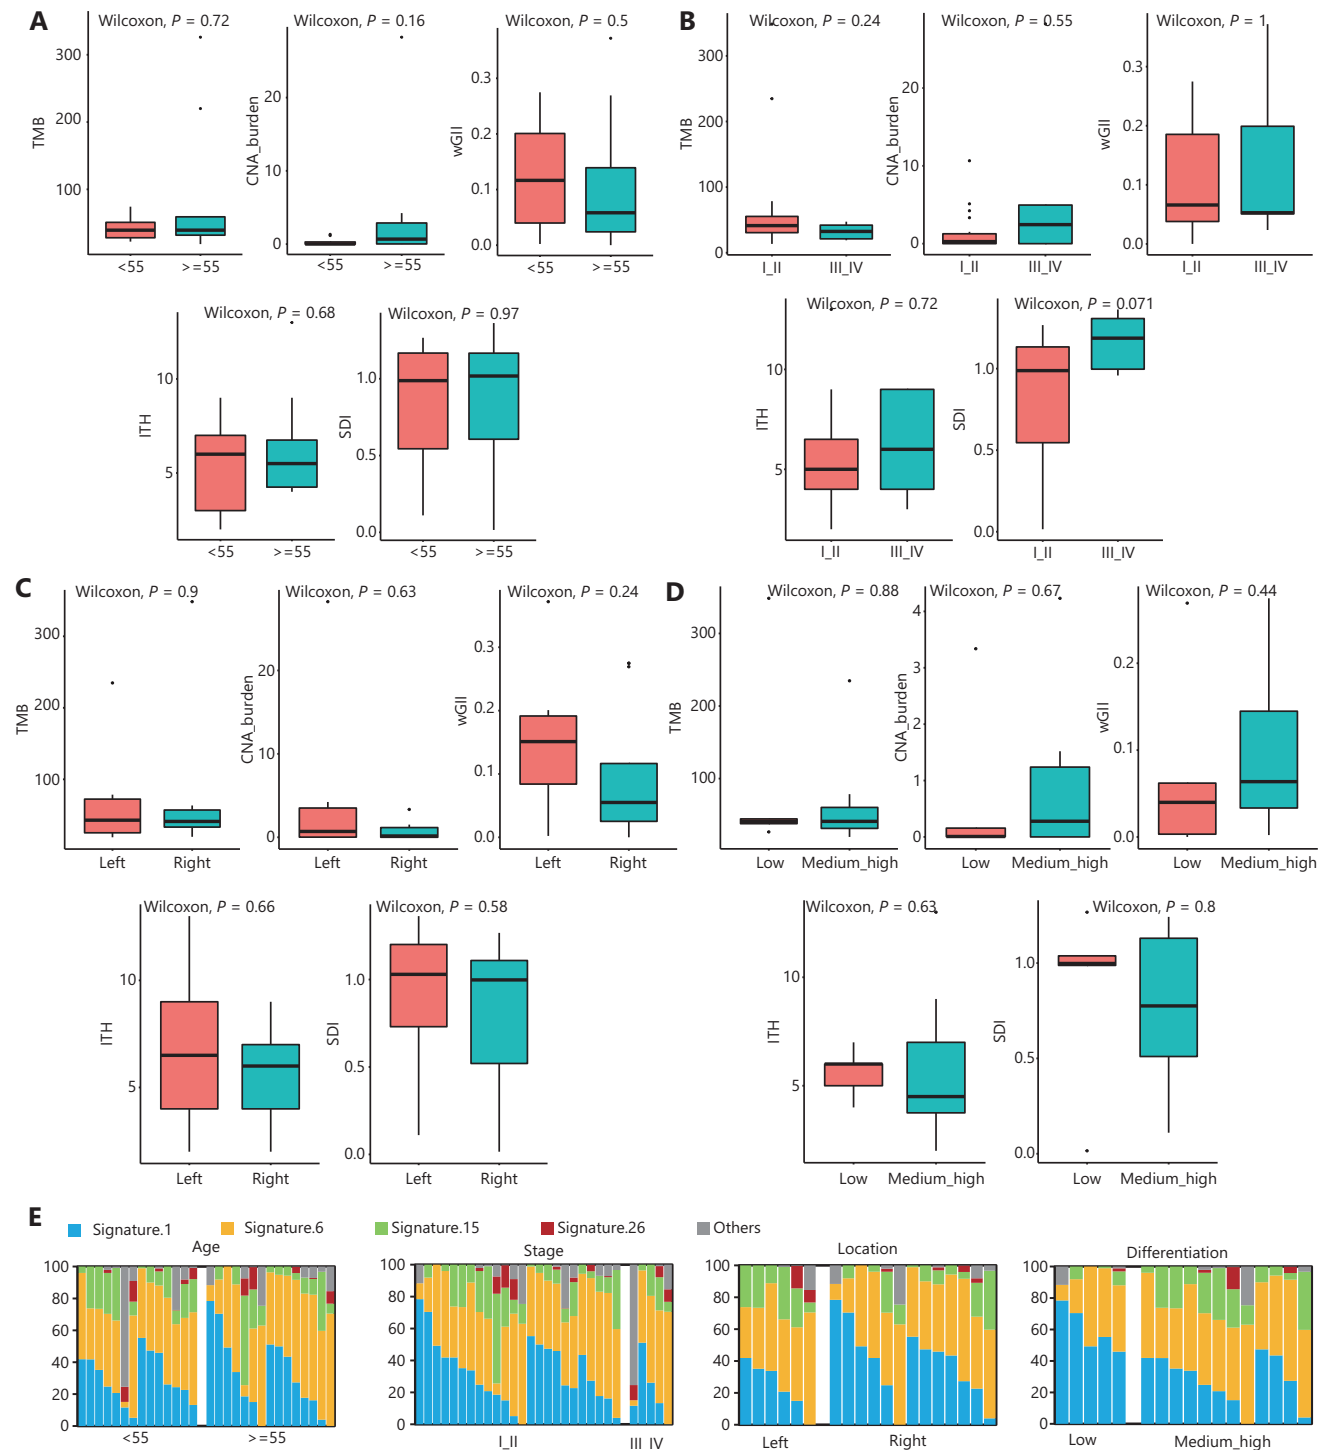

**Figure S2** Comparison of genetic features in groups with different clinical features. (A) TMB, CNV burden, wGII, ITH index, and SDI in groups with different ages. (B) TMB, CNV burden, wGII, ITH index, and SDI in groups with different clinical stages. (C) TMB, CNV burden, wGII, ITH index, and SDI in groups with different tumor locations. (D) TMB, CNV burden, wGII, ITH index, and SDI in groups with different degrees of differentiation. (E) Mutational signatures in groups with different ages, clinical stages, tumor locations, and degrees of differentiation.
